# Supplementary material
Source: PubMed Central journal article supplement (PMC3346420)
Supplement: supp_11.5.654_FigS1-S2_TableS1-S2.pdf [file supp_11.5.654_FigS1-S2_TableS1-S2.pdf]

|             |                                                                                 |                                       |    |
|-------------|---------------------------------------------------------------------------------|---------------------------------------|----|
| TVAG_137940 | -----MARTKQTARKSTGGKTPRKSLGAKAARKSTPTID                                         | -----SQGAKKQHRFRPGTVALREIRKYQKSTDLLIR | 66 |
| TVAG_211260 | -----MARTKQTARKSTGGKTPRKSLGAKAARKSTPTID                                         | -----SQGAKKQHRFRPGTVALREIRKYQKSTDLLIR | 66 |
| TVAG_224650 | -----MARTKQTARKSTGGKTPRKSLGAKAARKSTPTID                                         | -----SQGAKKQHRFRPGTVALREIRKYQKSTDLLIR | 66 |
| TVAG_239330 | -----MARTKQTARKSTGGKTPRKSLGAKAARKSTPTID                                         | -----SQGAKKQHRFRPGTVALREIRKYQKSTDLLIR | 66 |
| TVAG_270800 | -----MARTKQTARKSTGGKTPRKSLGAKAARKSTPTID                                         | -----SQGAKKQHRFRPGTVALREIRKYQKSTDLLIR | 66 |
| TVAG_270890 | -----MARTKQTARKSTGGKTPRKSLGAKAARKSTPTID                                         | -----SQGAKKQHRFRPGTVALREIRKYQKSTDLLIR | 66 |
| TVAG_315320 | -----MARTKQTARKSTGGKTPRKSLGAKAARKSTPTID                                         | -----SQGAKKQHRFRPGTVALREIRKYQKSTDLLIR | 66 |
| TVAG_341360 | -----MARTKQTARKSTGGKTPRKSLGAKAARKSTPTID                                         | -----SQGAKKQHRFRPGTVALREIRKYQKSTDLLIR | 66 |
| TVAG_399370 | -----MARTKQTARKSTGGKTPRKSLGAKAARKSTPTID                                         | -----SQGAKKQHRFRPGTVALREIRKYQKSTDLLIR | 66 |
| TVAG_414480 | -----MARTKQTARKSTGGKTPRKSLGAKAARKSTPTID                                         | -----SQGAKKQHRFRPGTVALREIRKYQKSTDLLIR | 66 |
| TVAG_445270 | -----MARTKQTARKSTGGKTPRKSLGAKAARKSTPTID                                         | -----SQGAKKQHRFRPGTVALREIRKYQKSTDLLIR | 66 |
| TVAG_452730 | -----MARTKQTARKSTGGKTPRKSLGAKAARKSTPTID                                         | -----SQGAKKQHRFRPGTVALREIRKYQKSTDLLIR | 66 |
| TVAG_470690 | -----MARTKQTARKSTGGKTPRKSLGAKAARKSTPTID                                         | -----SQGAKKQHRFRPGTVALREIRKYQKSTDLLIR | 66 |
| TVAG_497330 | -----MARTKQTARKSTGGKTPRKSLGAKAARKSTPTID                                         | -----SQGAKKQHRFRPGTVALREIRKYQKSTDLLIR | 66 |
| TVAG_499020 | -----MARTKQTARKSTGGKTPRKSLGAKAARKSTPTID                                         | -----SQGAKKQHRFRPGTVALREIRKYQKSTDLLIR | 66 |
| TVAG_270080 | -----MARTKQTARKSTGGKTPRKSLGAKAARKSTPTID                                         | -----SQGAKKQHRFRPGTVALREIRKYQKSTDLLIR | 66 |
| TVAG_087830 | -----MARTKQTARKTGGKTPRKSLGAKAARKAIPVTD                                          | -----SQGAKKQHRFRPGTVALREIRKYQKSTDLLIR | 66 |
| TVAG_185390 | -----MEEEPRIHRGKRRIPSSGAARPPDNSSDKSESQKKQRKR--NSWLREIHFYQKTDNLLIR               | 62                                    |    |
| TVAG_224460 | MASTRYADDWSFFDDPDNRSSRLEFSIPSQWSQLDVIKPAKKQLKKKKLPNPDQPKPKKHNHVLKEIRTYQNSVDLLIP | 80                                    |    |

|             |                                                                               |                                                          |        |
|-------------|-------------------------------------------------------------------------------|----------------------------------------------------------|--------|
| TVAG_137940 | KLPFQRLVREIASGFR                                                              | GDLRFQSSAIAALQEASEAYLVGLFEDTNLCAIHANRVTIMERDVQLAQRIRGERN | -- 138 |
| TVAG_211260 | KLPFQRLVREIASGFR                                                              | GDLRFQSSAIAALQEASEAYLVGLFEDTNLCAIHANRVTIMERDVQLAQRIRGERN | -- 138 |
| TVAG_224650 | KLPFQRLVREIASGFR                                                              | GDLRFQSSAIAALQEASEAYLVGLFEDTNLCAIHANRVTIMERDVQLAQRIRGERN | -- 138 |
| TVAG_239330 | KLPFQRLVREIASGFR                                                              | GDLRFQSSAIAALQEASEAYLVGLFEDTNLCAIHANRVTIMERDVQLAQRIRGERN | -- 138 |
| TVAG_270800 | KLPFQRLVREIASGFR                                                              | GDLRFQSSAIAALQEASEAYLVGLFEDTNLCAIHANRVTIMERDVQLAQRIRGERN | -- 138 |
| TVAG_270890 | KLPFQRLVREIASGFR                                                              | GDLRFQSSAIAALQEASEAYLVGLFEDTNLCAIHANRVTIMERDVQLAQRIRGERN | -- 138 |
| TVAG_315320 | KLPFQRLVREIASGFR                                                              | GDLRFQSSAIAALQEASEAYLVGLFEDTNLCAIHANRVTIMERDVQLAQRIRGERN | -- 138 |
| TVAG_341360 | KLPFQRLVREIASGFR                                                              | GDLRFQSSAIAALQEASEAYLVGLFEDTNLCAIHANRVTIMERDVQLAQRIRGERN | -- 138 |
| TVAG_399370 | KLPFQRLVREIASGFR                                                              | GDLRFQSSAIAALQEASEAYLVGLFEDTNLCAIHANRVTIMERDVQLAQRIRGERN | -- 138 |
| TVAG_414480 | KLPFQRLVREIASGFR                                                              | GDLRFQSSAIAALQEASEAYLVGLFEDTNLCAIHANRVTIMERDVQLAQRIRGERN | -- 138 |
| TVAG_445270 | KLPFQRLVREIASGFR                                                              | GDLRFQSSAIAALQEASEAYLVGLFEDTNLCAIHANRVTIMERDVQLAQRIRGERN | -- 138 |
| TVAG_452730 | KLPFQRLVREIASGFR                                                              | GDLRFQSSAIAALQEASEAYLVGLFEDTNLCAIHANRVTIMERDVQLAQRIRGERN | -- 138 |
| TVAG_470690 | KLPFQRLVREIASGFR                                                              | GDLRFQSSAIAALQEASEAYLVGLFEDTNLCAIHANRVTIMERDVQLAQRIRGERN | -- 138 |
| TVAG_497330 | KLPFQRLVREIASGFR                                                              | GDLRFQSSAIAALQEASEAYLVGLFEDTNLCAIHANRVTIMERDVQLAQRIRGERN | -- 138 |
| TVAG_499020 | KLPFQRLVREIASGFR                                                              | GDLRFQSSAIAALQEASEAYLVGLFEDTNLCAIHANRVTIMERDVQLAQRIRGERN | -- 138 |
| TVAG_270080 | KLPFQRLVREIASGFR                                                              | GDLRFQSSAIAALQEASEAYLVGLFEDTNLCAIHANRVTIMERDVQLAQRIRGERN | -- 138 |
| TVAG_087830 | KLPFQRLVREIASGFR                                                              | GDLRFQSSAIAALQEAAEAYLVGLFEDTNLCAIHANRVTIMERDVQLAMRIRGERN | -- 138 |
| TVAG_185390 | KLPFCRLVKEITQSVSICEFRYTTGAMEALQEASEAFILIKLLEDGOVCAIHARRITLMNRDLQLAQRIRGDR     | ---                                                      | 134    |
| TVAG_224460 | RLSFRQRLVREIAHQNN-PTIKFQETAIQALQEASEAFILVGMMEDGNLCTIHAQRVITMKKDMKLAERIRGDSITE |                                                          | 154    |

**Figure S1.** Sequence alignment of H3 histones identified in the *T. vaginalis* genome database TrichDB (<http://trichdb.org/trichdb>). Histones highlighted in red were used in experiments: TVAG\_270080 (core H3); TVAG\_087830 (H3.3 variant); TVAG\_185390 (H3T); TVAG\_224460 (cenH3). Identical amino acids are shaded in grey.

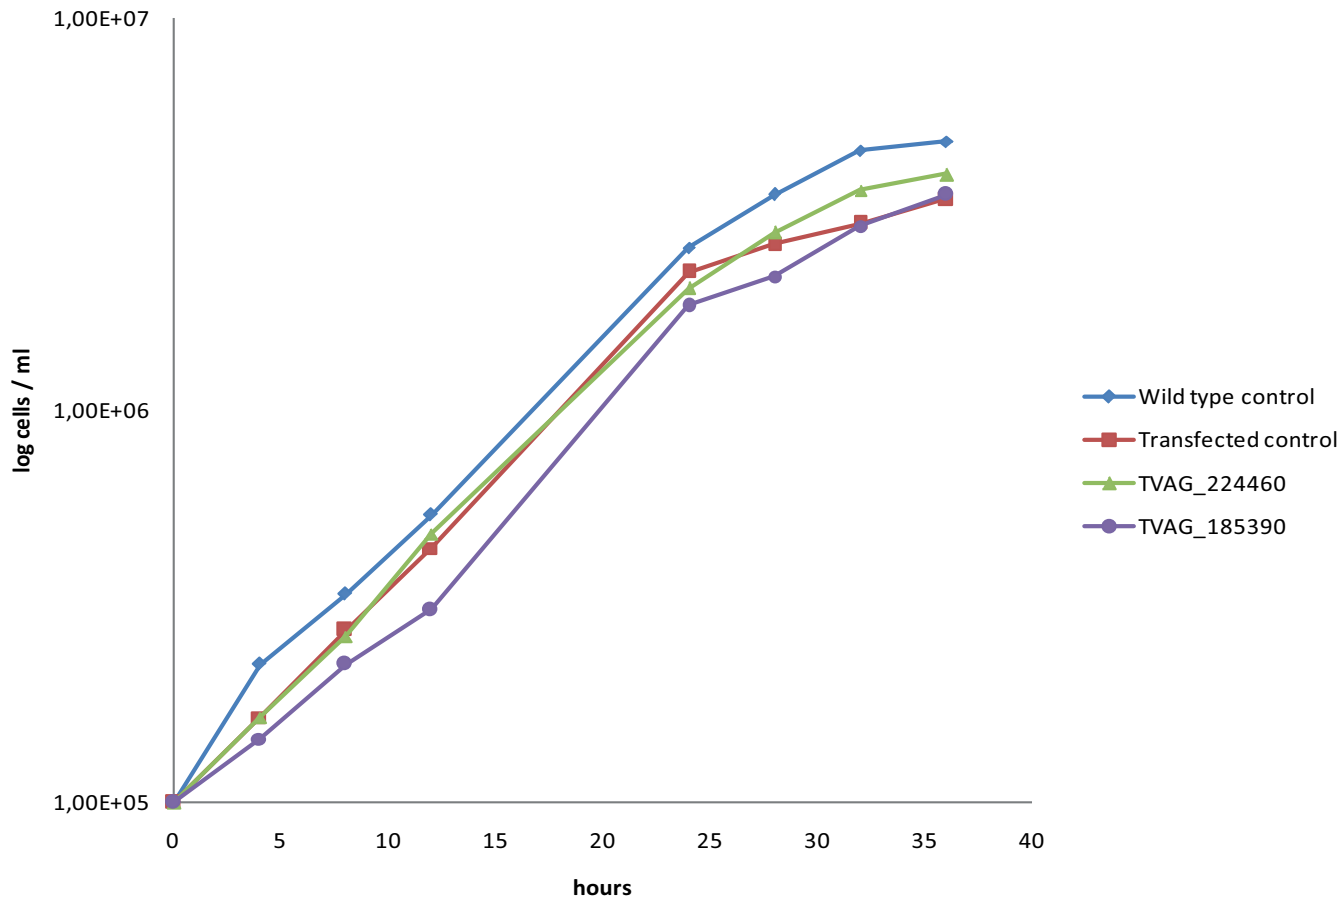

**Figure S2: Effect of transfection on the growth of *Trichomonas vaginalis* cells.**

The numbers of non-transfected cells (blue, rhombs) and cells transfected with TagVag vector (HA-tagged histones TVAG\_224460 – green, triangles; TVAG\_185390 – purple, circles; control gene TVAG\_206500 – red, squares) are indicated. Cell numbers were determined using a cell counter (Z2, Beckman Coulter). Values represent means of two determinations.

**Table S1.** List of sequences used for *T. vaginalis* genome searches.

| Organism                        | Name        | Accession number | <i>T. vaginalis</i> orthologues | Probability value |
|---------------------------------|-------------|------------------|---------------------------------|-------------------|
| <i>Homo sapiens</i>             | H2A         | NP_066544        | 17                              | $\leq 3.1e-36$    |
| <i>Giardia intestinalis</i>     | H2A         | AAF00590         | 17                              | $\leq 1.1e-17$    |
| <i>Homo sapiens</i>             | H2B         | CAA41051         | 14                              | $\leq 2.0e-18$    |
| <i>Giardia intestinalis</i>     | H2B         | ABV60242         | 14                              | $\leq 1.3e-12$    |
| <i>Homo sapiens</i>             | H3          | NP_003520        | 23                              | $\leq 2.9e-24$    |
| <i>Encephalitozoon cuniculi</i> | H3          | XP_955598        | 23                              | $\leq 4.8e-15$    |
| <i>Giardia intestinalis</i>     | H3B         | GL50803_3367     | 23                              | $\leq 9.3e-12$    |
|                                 | CenH3       | GL50803_20037    | 23                              | $\leq 1.9e-13$    |
|                                 | H3          | XP_001707235     | 23                              | $\leq 1.1e-17$    |
| <i>Trypanosoma brucei</i>       | H3          | XP_001218954     | 23                              | $\leq 4.8e-15$    |
| <i>Mastigamoeba balamuthi</i>   | H3          | AAF00588         | 23                              | $\leq 1.5e-18$    |
| <i>Entamoeba dispar</i>         | H3          | EDI_160110       | 23                              | $\leq 1.4e-17$    |
| <i>Toxoplasma gondii</i>        | H3          | AAO23911         | 23                              | $\leq 5.3e-25$    |
|                                 | H3.3        | AAM95790         | 23                              | $\leq 5.1e-20$    |
| <i>Arabidopsis thaliana</i>     | H3          | NP_196659        | 23                              | $\leq 3.7e-24$    |
| <i>Drosophila melanogaster</i>  | CenH3 (Cid) | Q9V6Q2           | 23                              | $\leq 7.4e-10$    |
| <i>Homo sapiens</i>             | H4          | NP_778224        | 21                              | $\leq 3.7e-33$    |
| <i>Giardia intestinalis</i>     | H4          | GL50803_135003   | 21                              | $\leq 5.1e-27$    |

*T. vaginalis* genome searches for orthologues of histone H2A, H2B, H3 and H4 using protein sequences of selected members of main eukaryotic groups as queries. BLAST searches were performed using TrichoDB tools (<http://trichodb.org>). In BLAST searches, all other sequences identified with queries listed above displayed probability values  $> 0,023$ .

**Table S2.** List of histones H2A, H2B, and H4 in *T. vaginalis*.

| H2A          | H2B           | H4           |
|--------------|---------------|--------------|
| TVAG_021440  | TVAG_026390   | TVAG_014920  |
| TVAG_026380  | TVAG_045410   | TVAG_085660  |
| TVAG_045400  | TVAG_075290   | TVAG_100580* |
| TVAG_055220  | TVAG_105960   | TVAG_129720  |
| TVAG_075280  | TVAG_144040   | TVAG_137930  |
| TVAG_105970* | TVAG_195300   | TVAG_191680  |
| TVAG_144030  | TVAG_226780   | TVAG_211270  |
| TVAG_195310  | TVAG_228640   | TVAG_224660  |
| TVAG_226790  | TVAG_268820   | TVAG_239320  |
| TVAG_321400  | TVAG_321390** | TVAG_270070  |
| TVAG_329280  | TVAG_329270   | TVAG_270900  |
| TVAG_380930  | TVAG_380920   | TVAG_315310  |
| TVAG_381770  | TVAG_447850   | TVAG_341350  |
| TVAG_389620  | TVAG_464720   | TVAG_351560  |
| TVAG_447860* |               | TVAG_392270  |
| TVAG_462660  |               | TVAG_399380  |
| TVAG_464710  |               | TVAG_414470  |
|              |               | TVAG_445260  |
|              |               | TVAG_452720  |
|              |               | TVAG_470680  |
|              |               | TVAG_499010  |

\* a single amino acid substitution

\*\* truncated protein lacking the first 63 amino acids
